# Supplementary material for: Insights into seasonal variation of wet deposition over Southeast Asia via precipitation adjustment from the findings of MICS-Asia III
Source: Copernicus journal article supplement (doi:10.5194/acp-2020-1179), 2020-12-28
Supplement: Supplementary file 1 [file acp-2020-1179-supplement.pdf]

*Supplemental of*

**Insights into seasonal variation of wet deposition over Southeast Asia  
via precipitation adjustment from the findings of MICS-Asia III**

Syuichi Itahashi et al.

*Correspondence to* Syuichi Itahashi (isyuichi@criepi.denken.or.jp)

The copyright of individual parts of the supplement might differ from the CC BY 4.0 License.

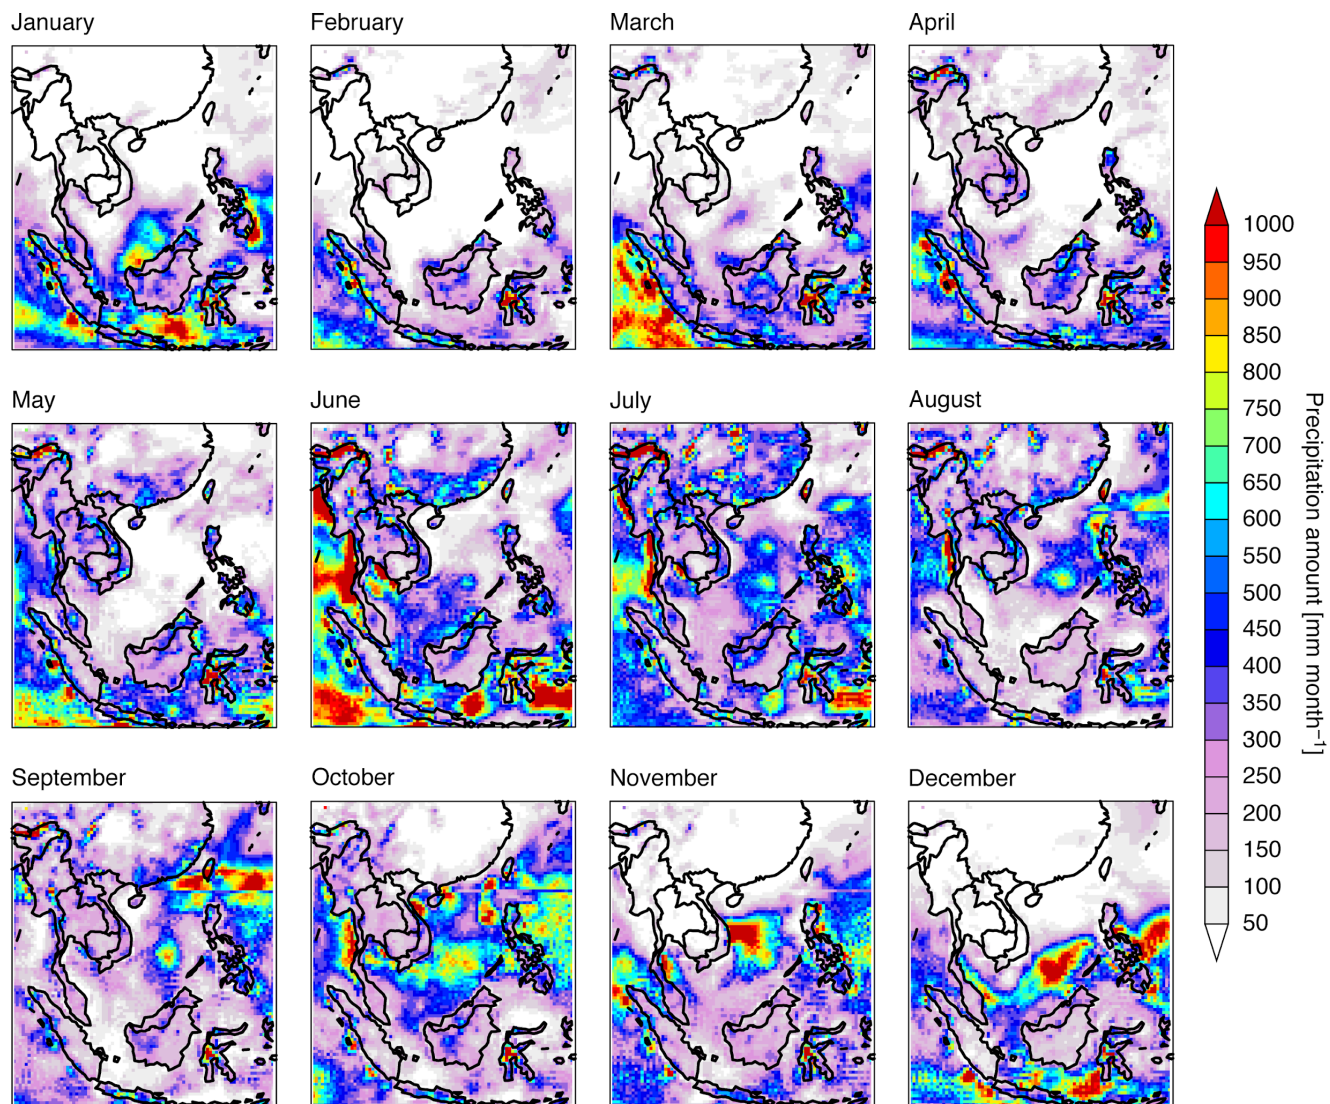

Figure S1. Monthly precipitation amount over Southeast Asia simulated by the Weather Research and Forecasting (WRF) model.

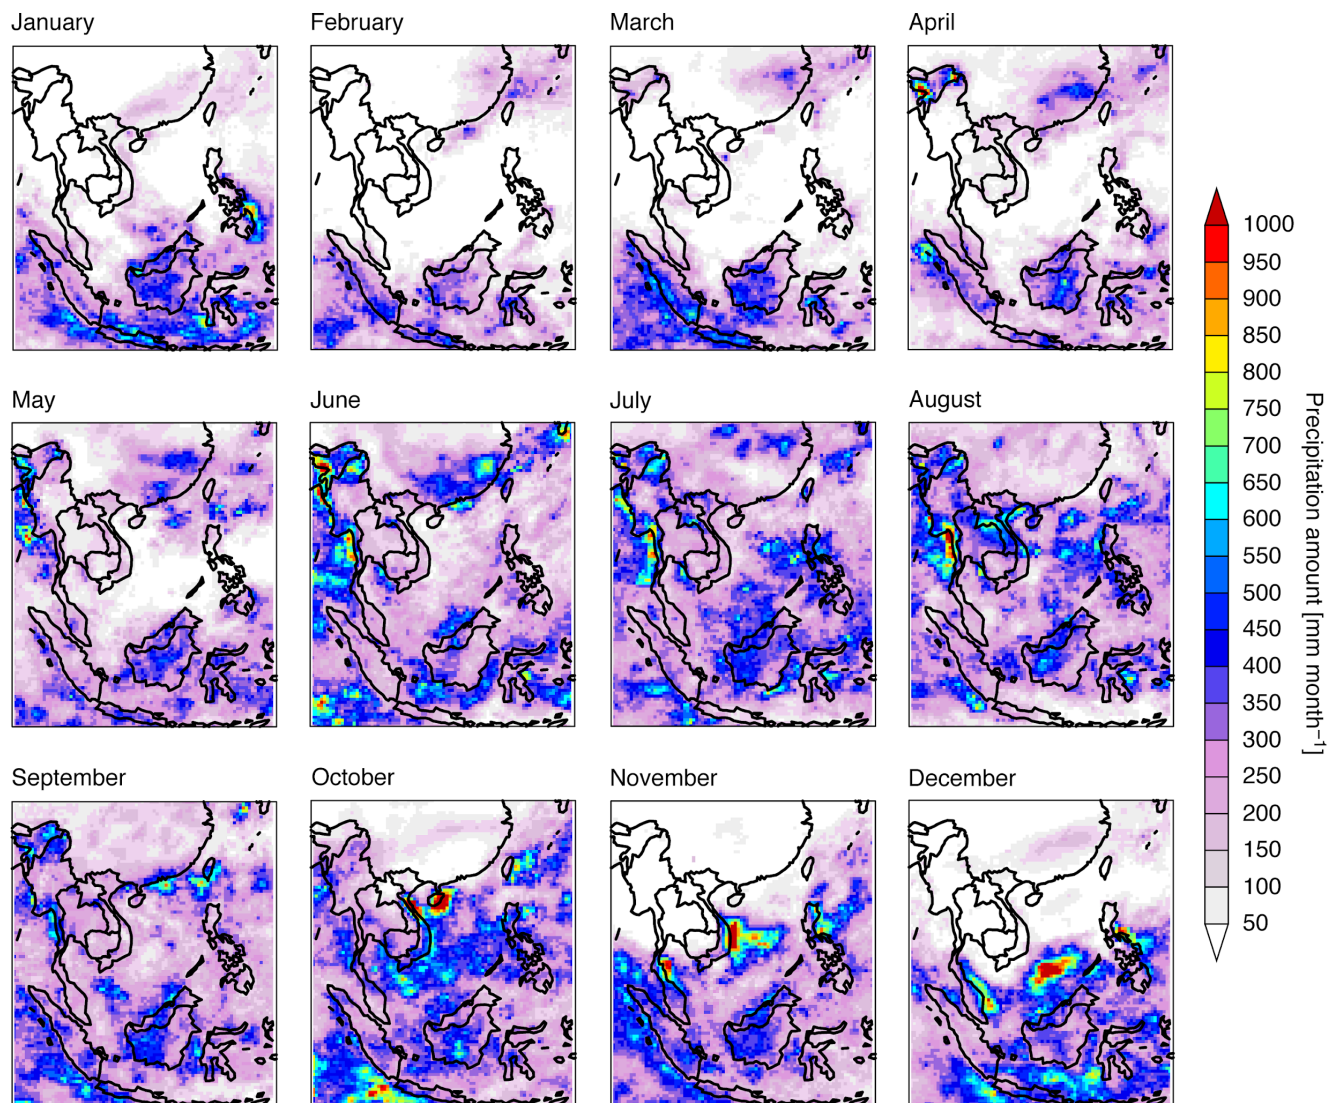

**Figure S2. Monthly precipitation amount over Southeast Asia from Tropical Rainfall Measuring Mission (TRMM) satellite measurements.**

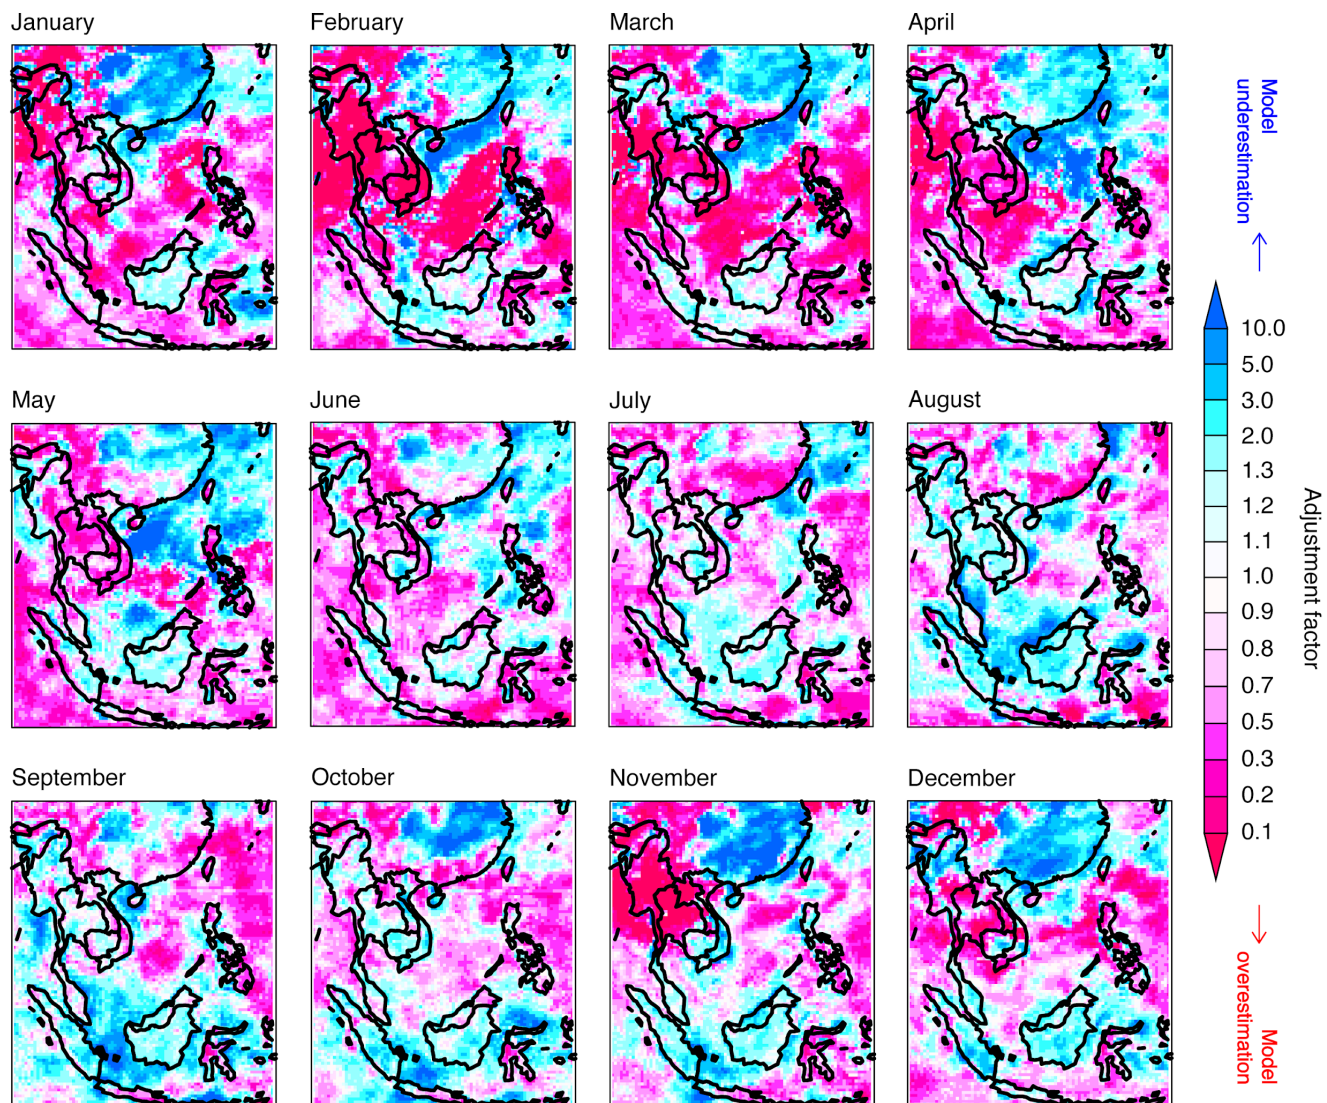

Figure S3. Adjustment factor (satellite measurement divided by modeled value) for precipitation over Southeast Asia in each month.
